# Supplementary material
Source: publisher figshare collection journal article supplement (https://rs.figshare.com/ndownloader/files/13533701)
Supplement: Supplementary file 1 [file 13533701]

## Sheet: Sheet1
Supplementary Material File S2 for article in Biology Letters:
Intrinsic pre-zygotic reproductive isolation of distantly related pea aphid host races
Varvara Fazalova1*, Bruno Nevado2, Ailsa McLean1 and H. Charles J. Godfray1
*Corresponding author
1Department of Zoology, University of Oxford,
2Department of Plant Sciences, University of Oxford
File S2. Names and sizes for microsatellite loci.
Letter-number codes correspond to different aphid clones. Colours highlight size differences for each locus.
Locus short name	Ap4 - 1	Ap4 - 2	Ap18 - 1	Ap18 - 2	Ap1 - 1	Ap1 - 2	Ap13 - 1	Ap13 - 2	Ap17 - 1	Ap17 - 2	Ap6 - 1	Ap6 - 2	Ap5 - 1	Ap5 - 2	S23 - 1	S23 - 2	ApSm11 - 1	ApSm11 - 2	ApS30 - 1	ApS30 - 2	Ap2 - 1	Ap2 - 2	Ap3 - 1	Ap3 - 2	S343 - 1	S343 - 2	Ap22 - 1	Ap22 - 2
Locus original name	AlB07M		ApH10M		AlA09M		ApF08M		ApH08M		AlB12M		AlB08M		S23		Sm11		S30		AlA12M		AlB04M		S3.43†		Ap-03
Reference	Caillaud 2004		Caillaud 2004		Caillaud 2004		Caillaud 2004		Caillaud 2004		Caillaud 2004		Caillaud 2004		Wilson et al 2004		Simon et al 1999		Wilson et al 2004		Caillaud 2004		Caillaud 2004		Wilson et al 2004		Kurokawa et al 2004
V1-60c_Vcra	115	121	192	192	307	315	162	162	253	271	334	368	268	300	128	134	194	200	298	298	426	426	265	269	184	190	232	244
V2-66a_Vcra	113	113	192	192	305	337	162	174	265	267	338	366	274	288	120	120	186	194	298	312	416	426	265	269	184	190	244	258
V3-65a_Vcra	115	131	182	192	307	307	162	162	253	253	332	338	282	302	128	132	194	194	298	298	418	426	265	269	184	190	244	244
V4-68a_Vcra	115	123	192	196	305	305	162	170	253	271	336	368	268	278	128	132	194	194	296	298	426	444	265	271	194	194	244	246
V5-67a_Vcra	115	121	192	198	307	315	162	170	271	271	332	366	284	300	128	130	194	198	296	298	426	430	265	265	184	190	234	242
V6-56b_Vcra	113	113	192	198	307	315	162	168	245	253	332	338	276	278	128	128	194	196	298	306	426	426	255	269	190	194	238	242
M1-55b_Mlup	129	135	192	202	301	307	160	160	247	257	334	338	272	272	128	128	188	204	296	296	416	418	269	269	176	176	236	240
M2-05b_Mlup	94	119	192	216	301	335	160	162	247	267	334	334	NA	NA	130	138	186	188	296	296	NA	NA	265	269	174	176	240	240
M3-03b_Mlup	119	137	192	192	317	327	160	162	257	257	336	338	272	286	130	130	188	188	296	304	416	416	269	271	176	190	234	240
M4-58a_Mlup	119	119	192	192	301	305	162	162	247	257	328	330	284	290	130	130	186	188	296	304	416	428	269	269	176	190	234	246
M5-54a_Mlup	129	135	192	202	301	307	160	160	247	257	334	338	272	272	128	128	188	204	296	296	426	430	269	269	176	176	236	240
M6-24a_Mlup	119	137	194	194	NA	NA	160	164	247	257	330	332	258	286	128	128	188	202	296	306	416	416	263	269	176	176	236	236
L1-29d_Lpra	123	123	190	192	303	315	162	162	253	253	328	338	280	280	126	128	196	212	318	318	454	456	269	269	196	196	240	240
L2-64b_Lpra	123	123	190	206	311	315	162	162	253	253	340	346	308	310	126	128	206	212	318	320	454	456	269	271	190	198	234	240
L3-61b_Lpra	123	123	202	206	317	323	162	162	253	253	336	348	272	304	128	128	186	212	316	320	454	454	269	271	196	196	234	234
L4-70a_Lpra	NA	NA	NA	NA	NA	NA	NA	NA	NA	NA	NA	NA	NA	NA	126	128	206	212	318	320	454	456	265	271	196	198	240	240
L5-63a_Lpra	123	123	192	206	301	317	162	174	253	253	334	336	282	282	128	128	186	196	318	318	424	454	269	271	178	202	234	240
L6-62c_Lpra	123	123	190	194	315	327	162	162	253	253	328	334	280	284	128	128	194	196	318	318	436	456	269	269	190	196	234	240

## Sheet: Sheet2
used name	Locus name publications	repeat motif		primer sequence	developped by
Ap1	AlA09M	(TC)12	F:	CCTCTCACTCCATATCTCTC	Caillaud 2004
			R:	ACTTACAGTCCTCTGGCCAT
Ap2	AlA12M	(CT)12	F:	ACCTACGACCAACGACACAC	Caillaud 2004
			R:	GATCACGAGACCTGCATTAC
Ap3	AlB04M	(GA)11	F:	CAGCGCGCAGCGTATTATTA	Caillaud 2004
			R:	TGGTTCGTCGTGCTGTCTCG
Ap4	AlB07M	(AG)20	F:	TACGGCGTGTCTCAGGTGCT	Caillaud 2004
			R:	ACAACTACCTAGGCCGACCA
Ap5	AlB08M	(CT)10	F:	GCATGCTCGCACTCGCTTAG	Caillaud 2004
			R:	CGAAATACTGCCAAAACGGG
Ap6	AlB12M	(AG)7AT(AG)18	F:	GCTTAACGTCAGACGCTGAA	Caillaud 2004
			R:	GCCATAACAGAGACGTCATC
Ap13	ApF08M	(TG)2TA(TG)8	F:	TAATCCGTCGTAATTGCGTT	Caillaud 2004
			R:	TAAGCCCTCACTCACCCCTC
Ap17	ApH08M	(CA)10	F:	GCGCACAGTGCGTATACATT	Caillaud 2004
			R:	TATTACAACGCACGTCATCG
Ap18	ApH10M	(CA)16	F:	ACGACGGGTGCAAGTATATT	Caillaud 2004
			R:	CAACATGACCTCGCTTCAGA
ApSm11	Sm11	(AC)9(AC)5	F:	GGTACCCCTATGTTATTACGCG	Simon et al 1999
			R:	AACCCTACGGGTAACGCC
S23	S23	(CT)14	F:	GGTCCGAGAGCATTCATTAGG	Wilson et al 2004
			R:	CGTCGTTGTCATTGTCGTCG
ApS30	S30	(CA)13	F:	CCGACATAAAACACACCCAG	Wilson et al 2004
			R:	GTTTTGCCTCCTCCCCTC
S3.43	S3.43†	mc(ATT)7.mc(TG)10CG(TG)6.mc	F:	GGCGAGACCCCTTAAAATCC	Wilson et al 2004
			R:	GAGATACTCTTTTCGTTAAACC
Ap22	Ap-03	(GA)11	F:	GCAGCAAACAGCAGGTGTAAA	Kurokawa et al 2004
			R:	ACAATTGCTCGATGGTCCTC
